# Supplementary material
Source: PubMed Central journal article supplement (PMC5771643)
Supplement: NIHMS928273-supplement-Supplemental_Figure.pdf [file NIHMS928273-supplement-Supplemental_Figure.pdf]

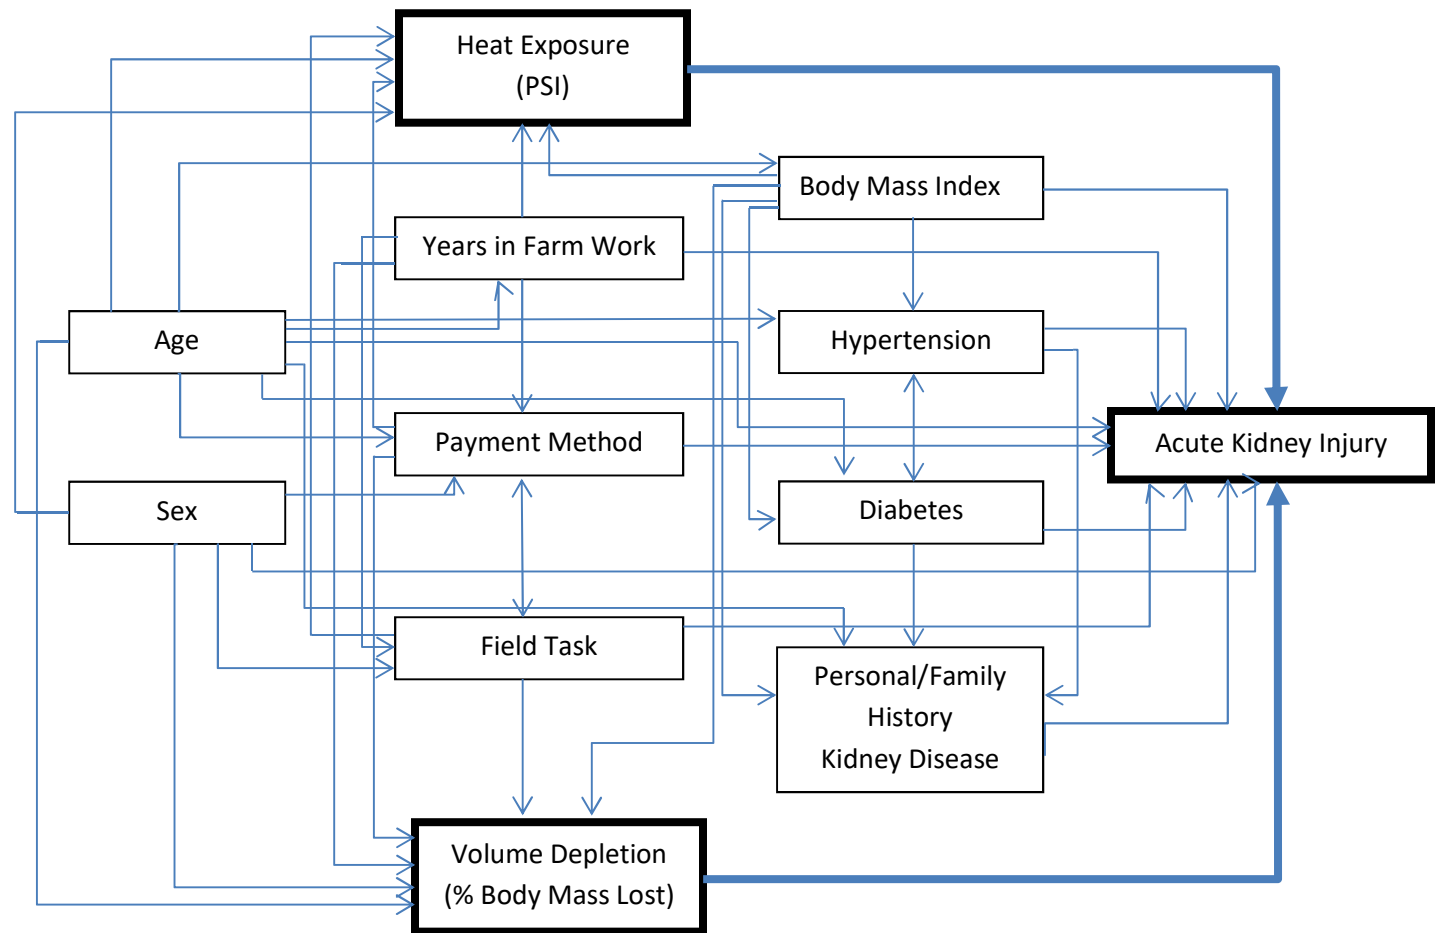

Supplemental Figure 1. Directed Acyclic Graph showing relationships of Heat Strain and Volume Depletion on Acute Kidney Injury with potential confounders
